# Supplementary material for: The Role of Autophagy in Genome Stability through Suppression of Abnormal Mitosis under Starvation
Source: PubMed Central journal article supplement (PMC3561091; doi:10.1371/journal.pgen.1003245), 2013-01-31

Figure S2

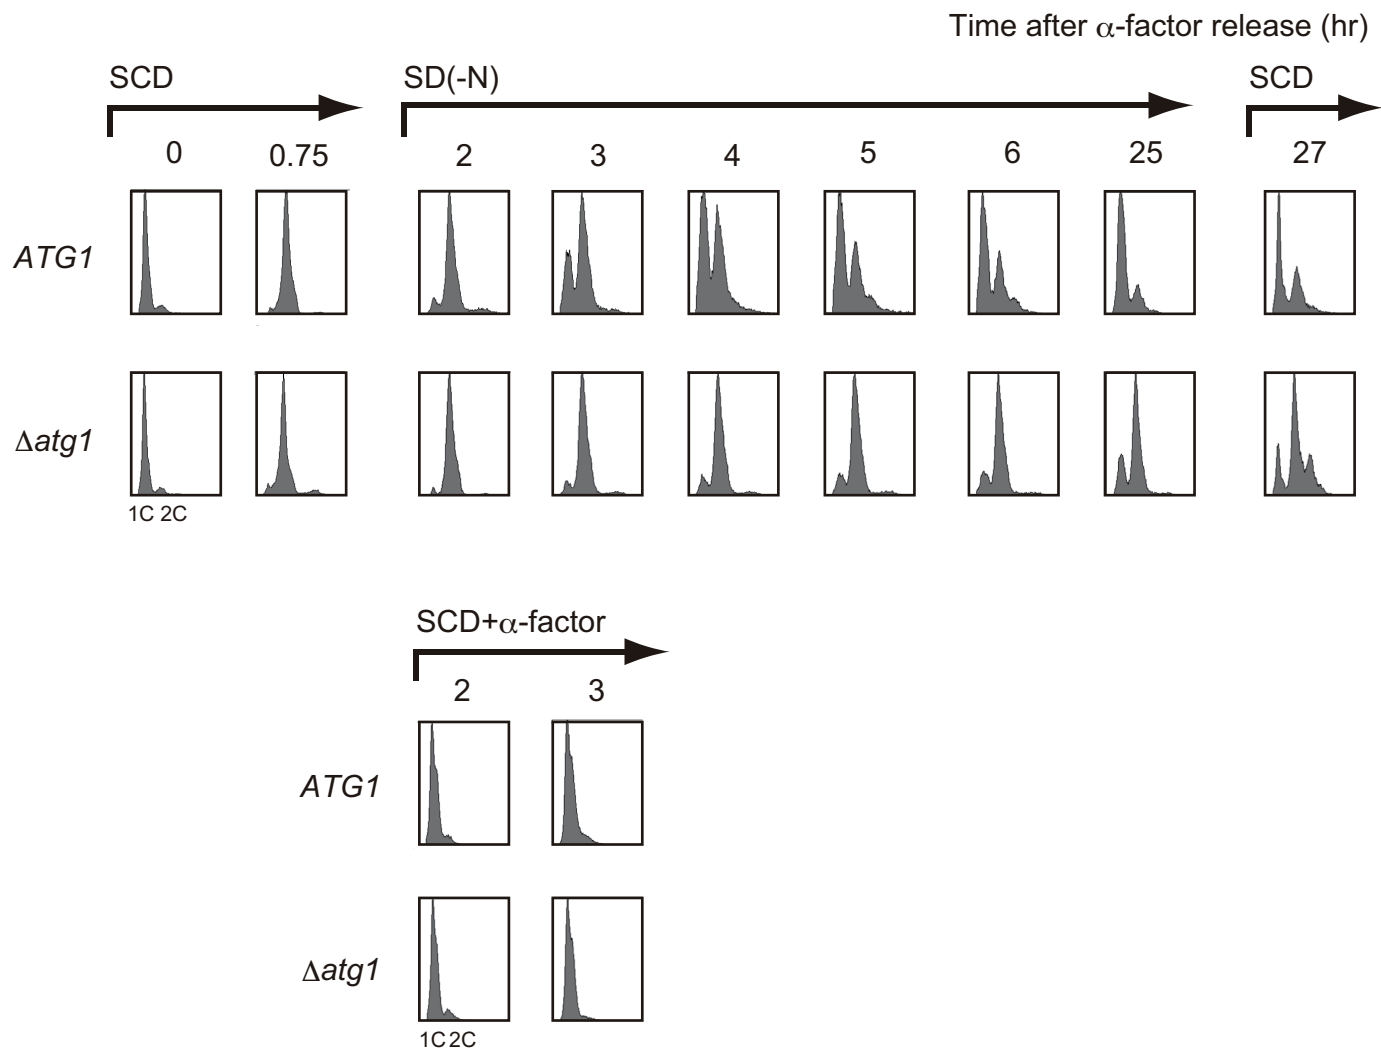

Supplement: pgen.1003245.s002.pdf [file pgen.1003245.s002.pdf]
