# Supplementary material for: The Role of Autophagy in Genome Stability through Suppression of Abnormal Mitosis under Starvation
Source: PubMed Central journal article supplement (PMC3561091; doi:10.1371/journal.pgen.1003245), 2013-01-31
Supplement: pgen.1003245.s003.pdf [file pgen.1003245.s003.pdf]

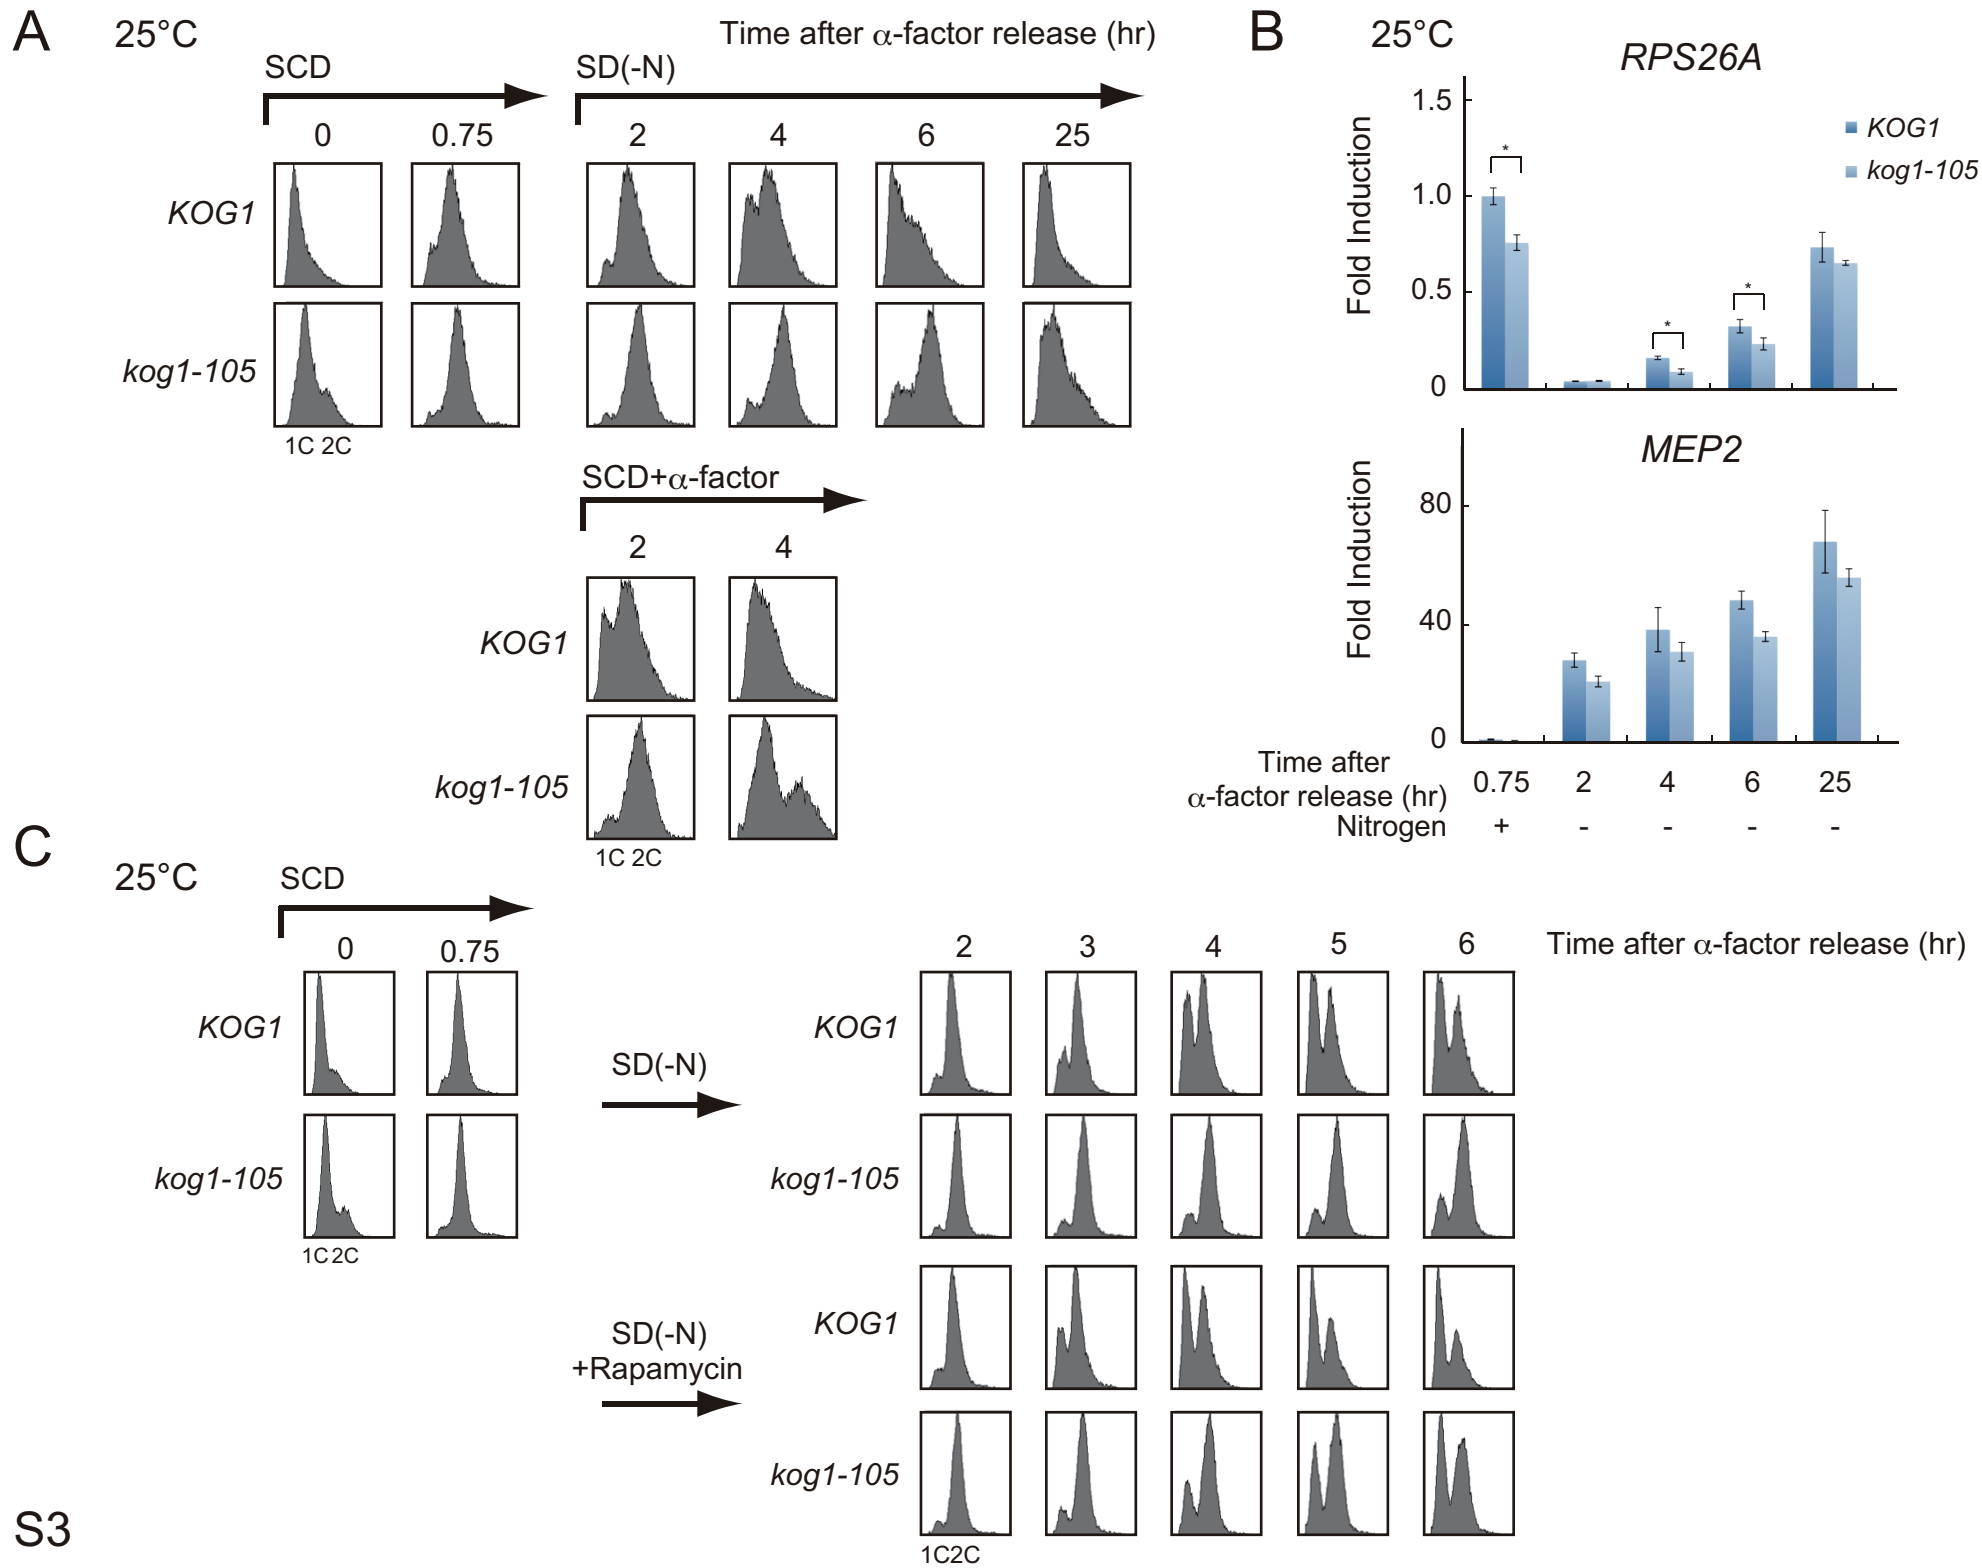

Figure S3
