# Supplementary material for: The Role of Autophagy in Genome Stability through Suppression of Abnormal Mitosis under Starvation
Source: PubMed Central journal article supplement (PMC3561091; doi:10.1371/journal.pgen.1003245), 2013-01-31

# Figure S5

Figure 1A

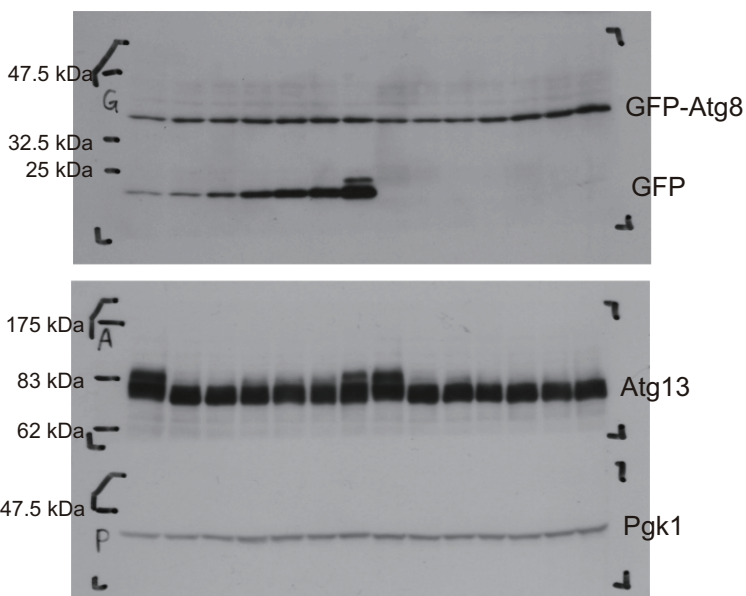

Figure 1C

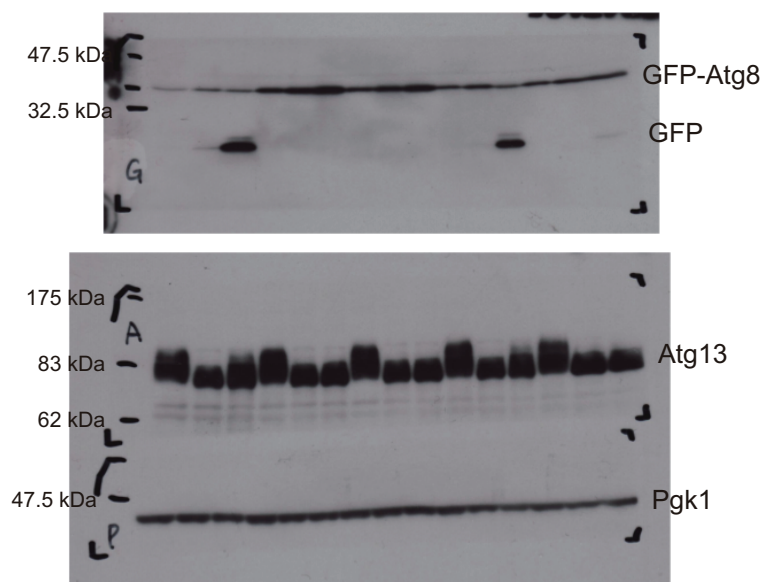

Figure 2B

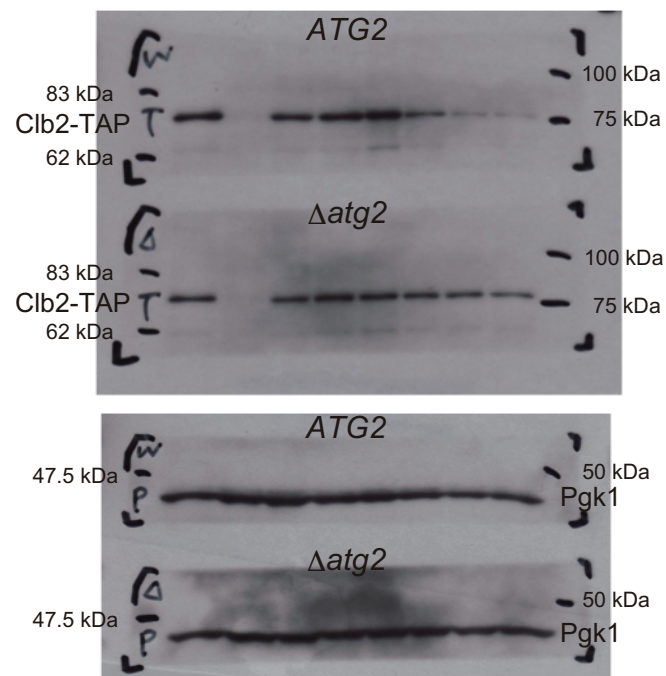

Figure 6C

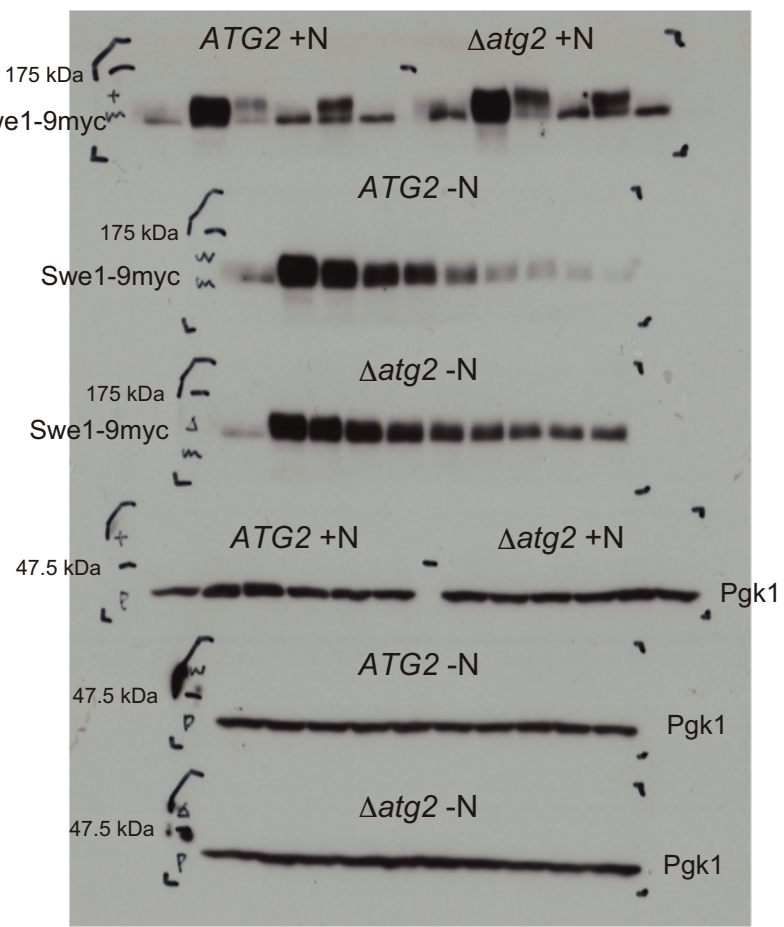

Supplement: pgen.1003245.s005.pdf [file pgen.1003245.s005.pdf]
