# Supplementary material for: The Role of Autophagy in Genome Stability through Suppression of Abnormal Mitosis under Starvation
Source: PubMed Central journal article supplement (PMC3561091; doi:10.1371/journal.pgen.1003245), 2013-01-31
Supplement: pgen.1003245.s006.pdf [file pgen.1003245.s006.pdf]

**Table S1.** Yeast strains used in this study

| Strain     | Genotype                                                                                             | Source           |
|------------|------------------------------------------------------------------------------------------------------|------------------|
| W303-1B    | <i>MATa ade2 ura3 trp1 his3 leu2</i>                                                                 | Laboratory stock |
| W303-1A    | <i>MATα ade2 ura3 trp1 his3 leu2</i>                                                                 | Laboratory stock |
| SAY122     | <i>MATa ura3 trp1 his3 leu2 TUB1-GFP::LEU2</i>                                                       | Laboratory stock |
| DBY4962    | <i>MATa ade2 his3-Δ200 ura3-52 leu2-Δ101::URA3::leu2-Δ102 lys2-Δ101::HIS3::lys2-Δ102</i>             | [39]             |
| AMY182-10A | <i>MATα ade2 ura3 trp1 his3 leu2 atg2::kanMX pRS314-GFP-ATG8 YEp352-ATG13</i>                        | Laboratory stock |
| AMY182-10C | <i>MATa ade2 ura3 trp1 his3 leu2 pRS314-GFP-ATG8 YEp352-ATG13</i>                                    | Laboratory stock |
| AMY236     | <i>MATa ade2 ura3 trp1 his3 leu2 atg1::kanMX pRS314-GFP-ATG8 YEp352-ATG13</i>                        | This study       |
| AMY237     | <i>MATa ade2 ura3 trp1 his3 leu2 atg7::kanMX pRS314-GFP-ATG8 YEp352-ATG13</i>                        | This study       |
| AMY238     | <i>MATa ade2 ura3 trp1 his3 leu2 atg11::kanMX pRS314-GFP-ATG8 YEp352-ATG13</i>                       | This study       |
| AMY239     | <i>MATa ade2 ura3 trp1 his3 leu2 pep4::kanMX pRS314-GFP-ATG8 YEp352-ATG13</i>                        | This study       |
| AMY240     | <i>MATa ura3 trp1 his3 leu2 TUB1-GFP::LEU2 atg1::kanMX</i>                                           | This study       |
| AMY250     | <i>MATa ura3 trp1 his3 leu2 TUB1-GFP::LEU2 atg2::kanMX</i>                                           | This study       |
| AMY251     | <i>MATa ade2 ura3 trp1 his3 leu2 CLB2-TAP::His3MX</i>                                                | This study       |
| AMY253     | <i>MATa ade2 ura3 trp1 his3 leu2 atg2::kanMX CLB2-TAP::His3MX</i>                                    | This study       |
| AMY255     | <i>MATa ura3 trp1 his3 leu2 TUB1-GFP::LEU2 atg2::HygMX</i>                                           | This study       |
| AMY260     | <i>MATa ura3 trp1 his3 leu2 TUB1-GFP::LEU2 swe1::kanMX</i>                                           | This study       |
| AMY261     | <i>MATa ura3 trp1 his3 leu2 TUB1-GFP::LEU2 atg2::HygMX swe1::kanMX</i>                               | This study       |
| AMY262     | <i>MATa ade2 his3-Δ200 ura3-52 leu2-Δ101::URA3::leu2-Δ102 lys2-Δ101::HIS3::lys2-Δ102 atg2::kanMX</i> | This study       |
| AMY296     | <i>MATa ade2 ura3 trp1 his3 leu2 atg2::KanMX</i>                                                     | This study       |
| AMY330     | <i>MATa ade2 ura3 trp1 his3 leu2 swe1::HIS3::SWE1-9myc::URA3 atg2::KanMX</i>                         | This study       |
| YYK409     | <i>MATa ade2 ura3 trp1 his3 leu2 kog1::LEU2 pRS313-KOG1</i>                                          | [20]             |
| YYK410     | <i>MATa ade2 ura3 trp1 his3 leu2 kog1::LEU2 pRS313-kog1-105</i>                                      | [20]             |
| YYK536     | <i>MATa ade2 ura3 trp1 his3 leu2 swe1::HIS3::SWE1-9myc::URA3</i>                                     | [66]             |
